# Supplementary material for: Longitudinal clinical and biomarker characteristics of non-manifesting LRRK2 G2019S carriers in the PPMI cohort
Source: PubMed Central journal article supplement (PMC9588016; doi:10.1038/s41531-022-00404-w), 2022-10-22
Supplement: 41531_2022_404_MOESM1_ESM.pdf [file 41531_2022_404_MOESM1_ESM.pdf]

Supplementary Table 1. Change in clinical characteristics among *LRRK2* G2019S carriers with vs without baseline hyposmia

|                                                  | <i>LRRK2</i> G2019S carriers: baseline hyposmia |                    |                    | <i>LRRK2</i> G2019S carriers: no baseline hyposmia |                     |                     | p value |
|--------------------------------------------------|-------------------------------------------------|--------------------|--------------------|----------------------------------------------------|---------------------|---------------------|---------|
|                                                  | Baseline<br>(N = 20)                            | Year 1<br>(N = 20) | Year 2<br>(N = 13) | Baseline<br>(N = 156)                              | Year 1<br>(N = 152) | Year 2<br>(N = 127) |         |
| <b>MDS-UPDRS total score</b>                     | 11.2 (11.3)                                     | 11.4 (11.7)        | 12.1 (14.7)        | 8.6 (6.9)                                          | 9.4 (7.9)           | 9.1 (8.5)           | 0.6752  |
| <b>MDS-UPDRS Part I</b>                          | 5.0 (5.0)                                       | 5.5 (5.8)          | 5.0 (5.6)          | 4.8 (3.7)                                          | 5.0 (3.9)           | 4.7 (3.9)           | 0.8862  |
| <b>MDS-UPDRS Part II</b>                         | 2.3 (3.9)                                       | 2.9 (5.4)          | 2.7 (4.1)          | 1.0 (1.9)                                          | 1.2 (2.2)           | 1.3 (2.4)           | 0.3978  |
| <b>MDS-UPDRS Part III</b>                        | 4.7 (5.9)                                       | 4.2 (3.9)          | 3.8 (5.3)          | 2.9 (3.8)                                          | 3.1 (4.1)           | 3.2 (4.9)           | 0.6363  |
| <b>MOCA total score, mean (SD; range)</b>        | 26.9 (2.3; 22-30)                               | 26.8 (2.6; 22-30)  | 27.2 (2.3; 23-30)  | 26.8 (2.5; 18-30)                                  | 27.1 (2.5; 16-30)   | 26.9 (2.5; 20-30)   | 0.9816  |
| <b>GDS-15 total score</b>                        | 2.2 (3.9)                                       | 1.9 (3.7)          | 2.5 (4.6)          | 1.7 (2.2)                                          | 1.5 (1.8)           | 1.6 (2.0)           | 0.9198  |
| <b>SCOPA-AUT total score</b>                     | 10.8 (6.2)                                      | 11.2 (8.5)         | 11.3 (7.0)         | 8.2 (6.0)                                          | 8.5 (6.3)           | 8.3 (6.1)           | 0.4918  |
| <b>Orthostatic systolic blood pressure drop</b>  | -3.1 (12.8)                                     | -0.2 (11.2)        | -1.3 (7.8)         | 0.5 (10.7)                                         | -1.0 (11.2)         | -0.4 (10.9)         | 0.7726  |
| <b>Orthostatic diastolic blood pressure drop</b> | -5.2 (6.4)                                      | -3.9 (7.8)         | -2.3 (7.0)         | -3.5 (7.8)                                         | -4.7 (7.6)          | -3.3 (7.6)          | 0.4713  |
| <b>State trait anxiety score</b>                 | 64.9 (18.6)                                     | 63.0 (22.6)        | 70.9 (24.2)        | 60.9 (16.5)                                        | 59.8 (15.8)         | 59.5 (15.8)         | 0.5323  |
| <b>QUIP (≥ 1 disorder)</b>                       | 5 (28%)                                         | 5 (29%)            | 3 (27%)            | 41 (26%)                                           | 40 (27%)            | 41 (33%)            | 0.8616  |
| <b>Epworth sleepiness scale (≥ 10)</b>           | 2 (11%)                                         | 4 (22%)            | 3 (27%)            | 16 (10%)                                           | 13 (9%)             | 11 (9%)             | 0.0686  |
| <b>RBDSQ (≥ 5)</b>                               | 2 (12%)                                         | 4 (25%)            | 1 (9%)             | 36 (23%)                                           | 31 (21%)            | 26 (21%)            | 0.6986  |

Data are mean (SD) or n (%) unless otherwise stated. Hyposmia defined by UPSIT ≤ 15th percentile for age and sex. Five or fewer participants per group missed any one assessment except for the non-hyposmia group at year 2 (seven missed the SCOPA-AUT). p values were found using generalized estimating equations modeling the change from baseline at follow-up (continuous outcomes) or the binary response at follow-up (categorical outcomes) while adjusting for the baseline value. Significance level for comparisons is  $p < 0.0038$  (after Bonferroni correction). UPSIT=University of Pennsylvania Smell Identification Test. MDS-UPDRS=Movement Disorder Society Unified Parkinson's Disease Rating Scale. MOCA=Montreal Cognitive Assessment. GDS-15=Geriatric Depression Scale (15-item). SCOPA-AUT=Scales for Outcomes in Parkinson's Disease-Autonomic. QUIP=Questionnaire for Impulsive-Compulsive Disorders in Parkinson's Disease. RBDSQ=REM Sleep Behavior Disorder Screening Questionnaire.

**Supplementary Table 2. Change in DAT specific binding ratios among *LRRK2* G2019S carriers and comparison to healthy controls at baseline**

|                     | <i>LRRK2</i> G2019S carriers |                        | Healthy controls       | p values       |                 |
|---------------------|------------------------------|------------------------|------------------------|----------------|-----------------|
|                     | Baseline<br>(N = 176)        | Year 2<br>(N = 140)    | Baseline<br>(N = 185)  | Time<br>effect | Group<br>effect |
| <b>Caudate SBR</b>  | 2.97 (0.57; 1.38-4.30)       | 2.89 (0.61; 1.27-4.59) | 2.99 (0.61; 1.56-5.20) | 0.1929         | 0.0520          |
| <b>Putamen SBR</b>  | 2.09 (0.51; 0.67-3.70)       | 2.03 (0.54; 0.89-3.23) | 2.15 (0.54; 0.88-3.89) | 0.0865         | 0.0237          |
| <b>Striatum SBR</b> | 2.53 (0.52; 1.17-4.00)       | 2.46 (0.56; 1.12-3.85) | 2.57 (0.55; 1.22-4.24) | 0.0910         | 0.0292          |

Data are mean (SD; range). DAT imaging results were missing for 8 *LRRK2* G2019S carriers at baseline, 18 *LRRK2* G2019S carriers at year 2, and 1 healthy control at baseline. p values were found using one-sample t-tests assessing the percent change from baseline to year 2 among *LRRK2* G2019S carriers (time effect) and inverse probability weighting methods comparing *LRRK2* G2019S at year 2 vs healthy controls at baseline while adjusting for age and sex (group effect). Significance level for comparisons is  $p < 0.0167$  (after Bonferroni correction). DAT=dopamine transporter. SBR=specific binding ratio.

**Supplementary Table 3. Change in urine bis(monoacylglycerol)phosphate among *LRRK2* G2019S carriers**

|                          | <i>LRRK2</i> G2019S carriers |                     |                     | <i>p</i> value |
|--------------------------|------------------------------|---------------------|---------------------|----------------|
|                          | Baseline<br>(N = 176)        | Year 1<br>(N = 172) | Year 2<br>(N = 140) | Time<br>effect |
| <b>Total di-18:1-BMP</b> | 17.5 (13.4)                  | 18.6 (17.0)         | 20.3 (17.7)         | 0.1523         |
| Median (min, max)        | 14.2 (0.9, 72.0)             | 13.0 (2.3, 99.0)    | 14.8 (1.7, 76.5)    |                |
| <b>Total di-22:6-BMP</b> | 77.3 (46.5)                  | 81.0 (52.8)         | 85.5 (55.2)         | 0.3304         |
| Median (min, max)        | 63.8 (10.6, 245.6)           | 67.2 (7.5, 289.6)   | 72.6 (15.8, 320.8)  |                |
| <b>2,2'-di-22:6 BMP</b>  | 61.3 (40.3)                  | 61.9 (42.5)         | 65.9 (42.9)         | 0.8168         |
| Median (min, max)        | 49.6 (8.1, 248.2)            | 47.0 (2.2, 244.2)   | 57.1 (12.8, 252.8)  |                |
| Missing BMP              | 33                           | 32                  | 54                  |                |

Data are mean (SD). *p* values were found using generalized estimating equations modeling the change from baseline at follow-up. Significance levels for comparisons are  $p < 0.0167$  (after Bonferroni correction). BMP= bis(monoacylglycerol)phosphate.

**Supplementary Table 4. Change in clinical characteristics among *LRRK2* G2019S carriers who phenoconverted vs those who did not**

|                                                  | <i>LRRK2</i> G2019S carriers: phenoconverters |                   |                   | <i>LRRK2</i> G2019S carriers: non-converters |                     |                     |
|--------------------------------------------------|-----------------------------------------------|-------------------|-------------------|----------------------------------------------|---------------------|---------------------|
|                                                  | Baseline<br>(N = 5)                           | Year 1<br>(N = 5) | Year 2<br>(N = 3) | Baseline<br>(N = 171)                        | Year 1<br>(N = 167) | Year 2<br>(N = 137) |
| <b>MDS-UPDRS total score</b>                     | 22.0 (12.7)                                   | 24.2 (11.7)       | 35.0 (19.3)       | 8.5 (6.9)                                    | 9.1 (7.9)           | 8.8 (8.1)           |
| <b>MDS-UPDRS Part I</b>                          | 6.4 (5.5)                                     | 6.0 (2.9)         | 7.7 (2.5)         | 4.7 (3.8)                                    | 5.0 (4.2)           | 4.7 (4.1)           |
| <b>MDS-UPDRS Part II</b>                         | 5.4 (3.4)                                     | 5.2 (3.2)         | 6.0 (2.6)         | 1.0 (2.1)                                    | 1.3 (2.6)           | 1.3 (2.5)           |
| <b>MDS-UPDRS Part III</b>                        | 10.2 (6.3)                                    | 13.0 (7.2)        | 21.3 (15.8)       | 2.9 (3.8)                                    | 2.9 (3.6)           | 2.8 (3.7)           |
| <b>MOCA total score, mean (SD; range)</b>        | 25.5 (2.6; 23-29)                             | 25.5 (1.0; 25-27) | 25.7 (0.6; 25-26) | 26.8 (2.4; 18-30)                            | 27.1 (2.5; 16-30)   | 26.9 (2.4; 20-30)   |
| <b>GDS-15 total score</b>                        | 1.4 (1.7)                                     | 1.2 (1.3)         | 0.7 (1.2)         | 1.7 (2.4)                                    | 1.5 (2.1)           | 1.7 (2.3)           |
| <b>SCOPA-AUT total score</b>                     | 10.6 (7.7)                                    | 10.4 (4.7)        | 12.3 (2.5)        | 8.4 (6.0)                                    | 8.7 (6.6)           | 8.5 (6.3)           |
| <b>Orthostatic systolic blood pressure drop</b>  | -2.0 (9.9)                                    | 1.0 (12.7)        | -2.0 (7.8)        | 0.2 (11.0)                                   | -0.9 (11.1)         | -0.4 (10.7)         |
| <b>Orthostatic diastolic blood pressure drop</b> | -0.6 (5.0)                                    | -5.2 (4.3)        | -4.7 (5.5)        | -3.8 (7.7)                                   | -4.6 (7.7)          | -3.2 (7.6)          |
| <b>State trait anxiety score</b>                 | 64.6 (21.0)                                   | 58.8 (12.8)       | 58.7 (9.0)        | 61.3 (16.6)                                  | 60.2 (16.7)         | 60.5 (16.9)         |
| <b>QUIP (≥ 1 disorder)</b>                       | 0 (0%)                                        | 0 (0%)            | 1 (33%)           | 46 (27%)                                     | 45 (28%)            | 43 (32%)            |
| <b>Epworth sleepiness scale (≥ 10)</b>           | 0 (0%)                                        | 0 (0%)            | 0 (0%)            | 18 (11%)                                     | 17 (10%)            | 14 (11%)            |
| <b>RBDSQ (≥ 5)</b>                               | 0 (0%)                                        | 1 (20%)           | 0 (0%)            | 38 (23%)                                     | 34 (21%)            | 27 (20%)            |

Data are mean (SD) or n (%) unless otherwise stated. Among phenoconverters, there were no missing values except for the MOCA (one missing value at baseline and year 1); among non-converters, five or fewer participants missed any one assessment except for at year 1 (six missed the MDS-UPDRS total score and RBDSQ) and year 2 (10 missed the SCOPA-AUT; six missed the STAI). MDS-UPDRS=Movement Disorder Society Unified Parkinson's Disease Rating Scale. MOCA=Montreal Cognitive Assessment. GDS-15=Geriatric Depression Scale (15-item). SCOPA-AUT=Scales for Outcomes in Parkinson's Disease-Autonomic. QUIP=Questionnaire for Impulsive-Compulsive Disorders in Parkinson's Disease. RBDSQ=REM Sleep Behavior Disorder Screening Questionnaire.

**Supplementary Table 5. Demographics and baseline characteristics of *LRRK2* G2019S vs *LRRK2* R1441G carriers**

|                                               | Group                                     |                                          | p values                                   |
|-----------------------------------------------|-------------------------------------------|------------------------------------------|--------------------------------------------|
|                                               | <i>LRRK2</i> G2019S carriers<br>(N = 176) | <i>LRRK2</i> R1441G carriers<br>(N = 16) | <i>LRRK2</i> G2019S vs <i>LRRK2</i> R1441G |
| <b>Sex (female)</b>                           | 99 (56%)                                  | 10 (63%)                                 | 0.7935                                     |
| <b>Age, mean (SD; range)</b>                  | 62.0 (7.7; 45-81)                         | 56.4 (5.2; 49-63)                        | 0.0035                                     |
| <b>Education (<math>\leq</math> 12 years)</b> | 26 (15%)                                  | 6 (38%)                                  | 0.0312                                     |
| <b>Ethnicity (Hispanic/Latino)</b>            | 15 (9%)                                   | 14 (88%)                                 | <.0001                                     |
| <b>Race (White)</b>                           | 171 (98%)                                 | 5 (31%)                                  | <.0001                                     |
| <b>Family history of PD (first-degree)</b>    | 152 (86%)                                 | 16 (100%)                                | 0.2286                                     |
| <b>UPSIT raw score, mean (SD; range)</b>      | 33.1 (4.3; 14-40)                         | 29.9 (2.6; 24-34)                        | <.0001                                     |
| <b>UPSIT percentile</b>                       |                                           |                                          | <.0001                                     |
| $\leq$ 15th                                   | 20 (11%)                                  | 8 (50%)                                  |                                            |
| 16th-50th                                     | 73 (41%)                                  | 8 (50%)                                  |                                            |
| > 50th                                        | 83 (47%)                                  | 0 (0%)                                   |                                            |
| <b>DAT deficit</b>                            | 21 (13%)                                  | 3 (19%)                                  | 0.4437                                     |
| Missing DAT results                           | 8                                         | 0                                        |                                            |
| <b>Caudate SBR</b>                            | 2.97 (0.57)                               | 3.10 (0.73)                              | 0.7824                                     |
| <b>Putamen SBR</b>                            | 2.09 (0.51)                               | 2.15 (0.64)                              | 0.2469                                     |
| <b>Striatum SBR</b>                           | 2.53 (0.52)                               | 2.63 (0.66)                              | 0.5036                                     |
| <b>MDS prodromal criteria (&gt; 80%)</b>      | 12 (7%)                                   | 0 (0%)                                   | 0.6036                                     |

Data are mean (SD) or n (%) unless otherwise stated. DAT deficit defined as < 65% age/sex-expected lowest putamen SBR. Ethnicity and race were missing for one *LRRK2* G2019S subject. p values for SBR measures were adjusted for age and sex using inverse probability weighting; all other p values were found using Fisher's exact and Wilcoxon rank-sum tests. UPSIT=University of Pennsylvania Smell Identification Test. DAT=dopamine transporter. SBR=specific binding ratio. MDS= International Parkinson and Movement Disorder Society.
